# Supplementary material for: MMP2 rs243866 and rs2285053 Polymorphisms and Alzheimer’s Disease Risk in Slovak Caucasian Population
Source: MDPI journal article supplement (doi:10.3390/life13040882), 2023-03-26
Supplement: s1 [file s1]

# Supplementary materials

**Table S1.** Association between *MMP2* rs243866 (-1575 G/A) SNP and LOAD in cohorts stratified according to the *APOE*  $\epsilon 4$  carrier status.

| Allele / Genotype                                          | LOAD         | Controls     | Genetic model                  | Logistic regression analysis<br><i>p</i> -Value | OR (95% CI)      |
|------------------------------------------------------------|--------------|--------------|--------------------------------|-------------------------------------------------|------------------|
| <b><i>APOE</i> <math>\epsilon 4</math>-positive cohort</b> |              |              |                                |                                                 |                  |
|                                                            |              |              | Allele contrast (A vs. G)      | 0.70                                            | 1.11 (0.66–1.85) |
| G                                                          | 135 (74.18%) | 105 (76.09%) | Codominant (GA vs. GG)         | 0.40                                            | 0.72 (0.35–1.51) |
| A                                                          | 47 (25.82%)  | 33 (23.91%)  | Codominant (AA vs. GG)         | 0.58                                            | 1.46 (0.45–4.79) |
| GG                                                         | 55 (60.44%)  | 41 (59.42%)  | Dominant (AA + GA vs. GG)      | 0.65                                            | 0.86 (0.44–1.68) |
| GA                                                         | 25 (27.47%)  | 23 (33.33%)  | Recessive (AA vs. GA + GG)     | 0.40                                            | 1.63 (0.51–5.19) |
| AA                                                         | 11 (12.09%)  | 5 (7.25%)    | Over-dominant (GA vs. GG + AA) | 0.31                                            | 0.69 (0.34–1.41) |
|                                                            |              |              | Log-additive                   | 0.97                                            | 1.01 (0.62–1.65) |
| <b><i>APOE</i> <math>\epsilon 4</math>-negative cohort</b> |              |              |                                |                                                 |                  |
|                                                            |              |              | Allele contrast (A vs. G)      | 0.53                                            | 1.11 (0.80–1.56) |
| G                                                          | 180 (72.58%) | 454 (74.67%) | Codominant (GA vs. GG)         | 0.91                                            | 0.98 (0.62–1.54) |
| A                                                          | 68 (27.42%)  | 154 (25.33%) | Codominant (AA vs. GG)         | 0.30                                            | 1.51 (0.69–3.29) |
| GG                                                         | 68 (54.84%)  | 171 (56.25%) | Dominant (AA + GA vs. GG)      | 0.80                                            | 1.06 (0.69–1.62) |
| GA                                                         | 44 (35.48%)  | 112 (36.84%) | Recessive (AA vs. GA + GG)     | 0.29                                            | 1.52 (0.71–3.26) |
| AA                                                         | 12 (9.68%)   | 21 (6.91%)   | Over-dominant (GA vs. GG + AA) | 0.74                                            | 0.93 (0.59–1.45) |
|                                                            |              |              | Log-additive                   | 0.52                                            | 1.12 (0.80–1.56) |

Allele and genotype counts are presented with frequencies in parentheses. *p*, OR, and 95% CI values for genotype comparisons were adjusted for age and sex. CI: confidence interval; LOAD: late-onset Alzheimer's disease; OR: odds ratio.

**Table S2.** Association between *MMP2* rs2285053 (-735 C/T) SNP and LOAD in cohorts stratified according to the *APOE*  $\epsilon 4$  carrier status.

| Allele / Genotype                                          | LOAD         | Controls     | Genetic model                  | Logistic regression analysis<br><i>p</i> -Value | OR (95% CI)       |
|------------------------------------------------------------|--------------|--------------|--------------------------------|-------------------------------------------------|-------------------|
| <b><i>APOE</i> <math>\epsilon 4</math>-positive cohort</b> |              |              |                                |                                                 |                   |
|                                                            |              |              | Allele contrast (T vs. C)      | 0.93                                            | 1.03 (0.55–1.92)  |
| C                                                          | 155 (85.16%) | 118 (85.51%) | Codominant (CT vs. CC)         | 0.57                                            | 1.24 (0.57–2.72)  |
| T                                                          | 27 (14.84%)  | 20 (14.49%)  | Codominant (TT vs. CC)         | 0.37                                            | 0.34 (0.03–3.72)  |
| CC                                                         | 65 (71.14%)  | 52 (75.36%)  | Dominant (TT + CT vs. CC)      | 0.79                                            | 1.11 (0.52–2.34)  |
| CT                                                         | 25 (27.47%)  | 14 (20.29%)  | Recessive (TT vs. CT + CC)     | 0.33                                            | 0.32 (0.03–3.52)  |
| TT                                                         | 1 (1.09%)    | 3 (4.35%)    | Over-dominant (CT vs. CC + TT) | 0.53                                            | 1.28 (0.59–2.80)  |
|                                                            |              |              | Log-additive                   | 0.95                                            | 0.98 (0.51–1.87)  |
| <b><i>APOE</i> <math>\epsilon 4</math>-negative cohort</b> |              |              |                                |                                                 |                   |
|                                                            |              |              | Allele contrast (T vs. C)      | 0.39                                            | 1.21 (0.79–1.85)  |
| C                                                          | 212 (85.48%) | 533 (87.66%) | Codominant (CT vs. CC)         | 0.40                                            | 1.23 (0.76–1.98)  |
| T                                                          | 36 (14.52%)  | 75 (12.34%)  | Codominant (TT vs. CC)         | 0.53                                            | 0.87 (0.04–21.53) |
| CC                                                         | 88 (70.97%)  | 230 (75.66%) | Dominant (TT + CT vs. CC)      | 0.43                                            | 1.22 (0.75–1.96)  |
| CT                                                         | 36 (29.03%)  | 73 (24.01%)  | Recessive (TT vs. CT + CC)     | 0.52                                            | 0.81 (0.03–20.10) |
| TT                                                         | 0 (0.00%)    | 1 (0.33%)    | Over-dominant (CT vs. CC + TT) | 0.40                                            | 1.23 (0.76–1.99)  |
|                                                            |              |              | Log-additive                   | 0.46                                            | 1.20 (0.75–1.92)  |

Allele and genotype counts are presented with frequencies in parentheses. *p*, OR, and 95% CI values for genotype comparisons were adjusted for age and sex. CI: confidence interval; LOAD: late-onset Alzheimer's disease; OR: odds ratio.
